# Supplementary material for: Lingual articulation in songbirds
Source: Oxford University Press journal article supplement (doi:10.1242/jeb.126532), 2015-01-01
Supplement: jeb126532supp.pdf [file jeb126532supp.pdf]

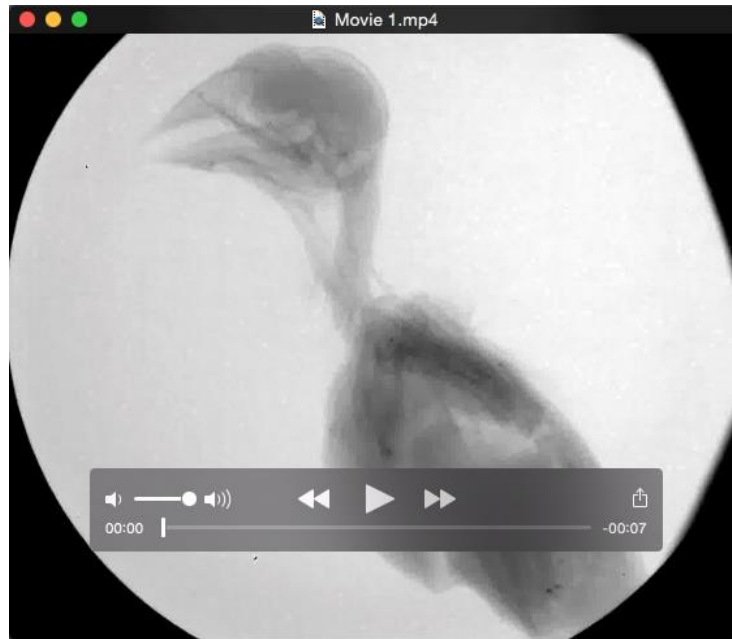

**Movie 1: X-ray recording of a male northern cardinal during song.** Tongue elevation can be seen towards the end of each downward-sweeping syllable in the sequence. The recording was made at 60 frames s<sup>-1</sup> and playback was slowed down to 1/4 of real time. Syllable 433-4.
